# Supplementary material for: Tumor Extrinsic Factors Mediate Primary T-DM1 Resistance in HER2-Positive Breast Cancer Cells
Source: MDPI journal article supplement (doi:10.3390/cancers13102331), 2021-05-12
Supplement: s1 [file s1]

A

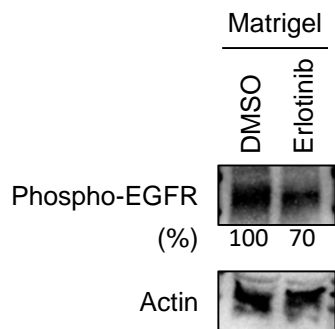

B

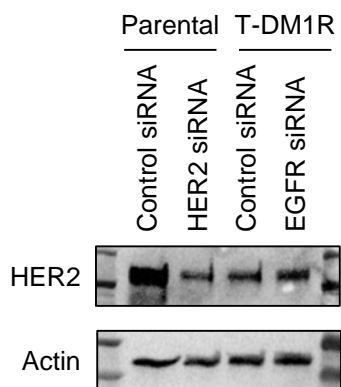

C

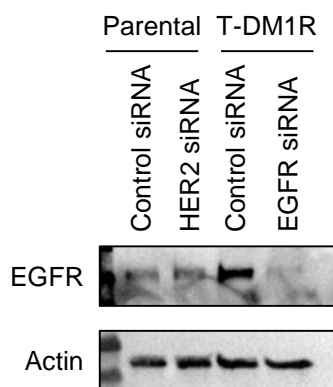

D

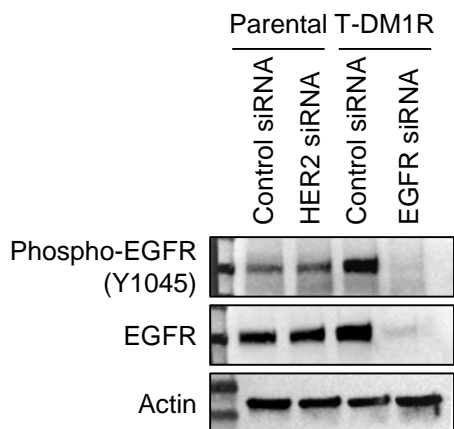

Figure S1

A

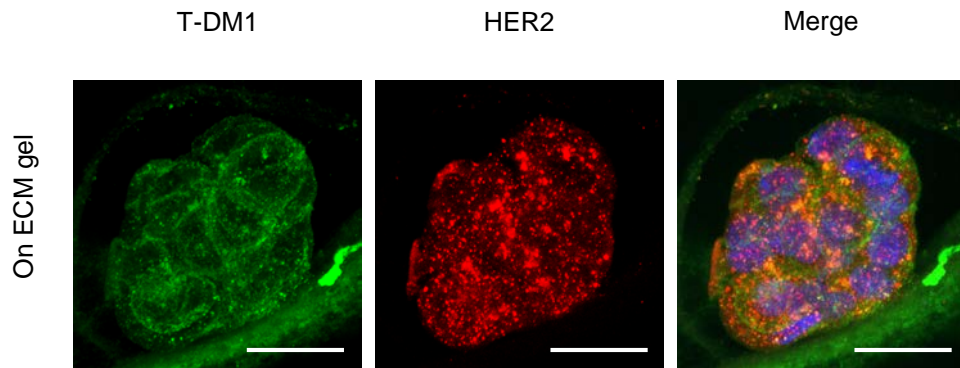

B

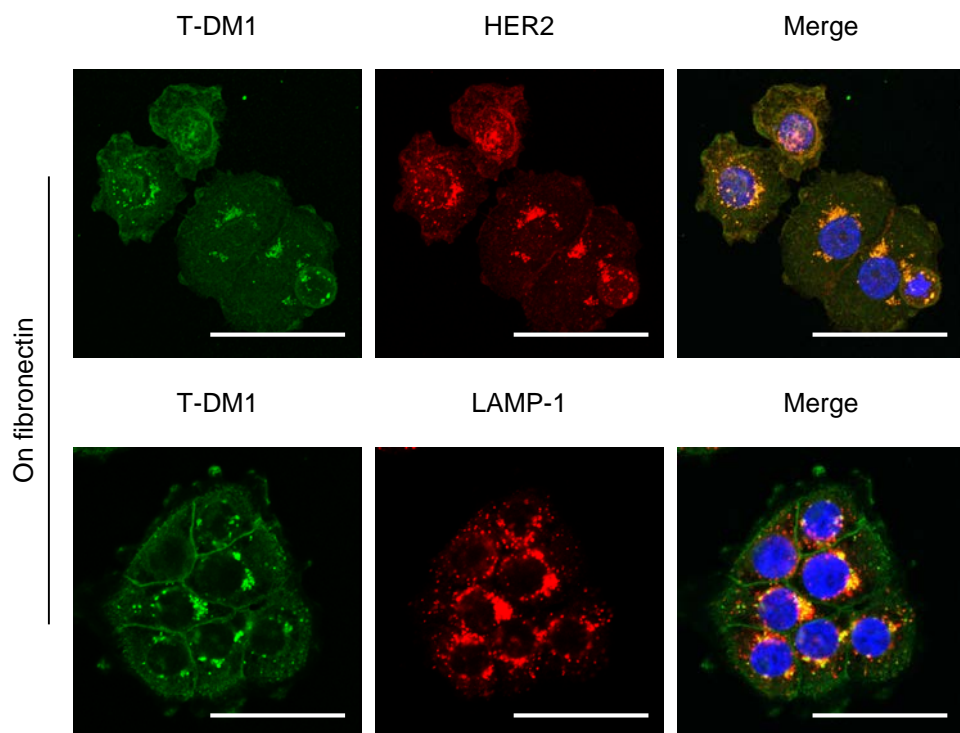

Figure S2

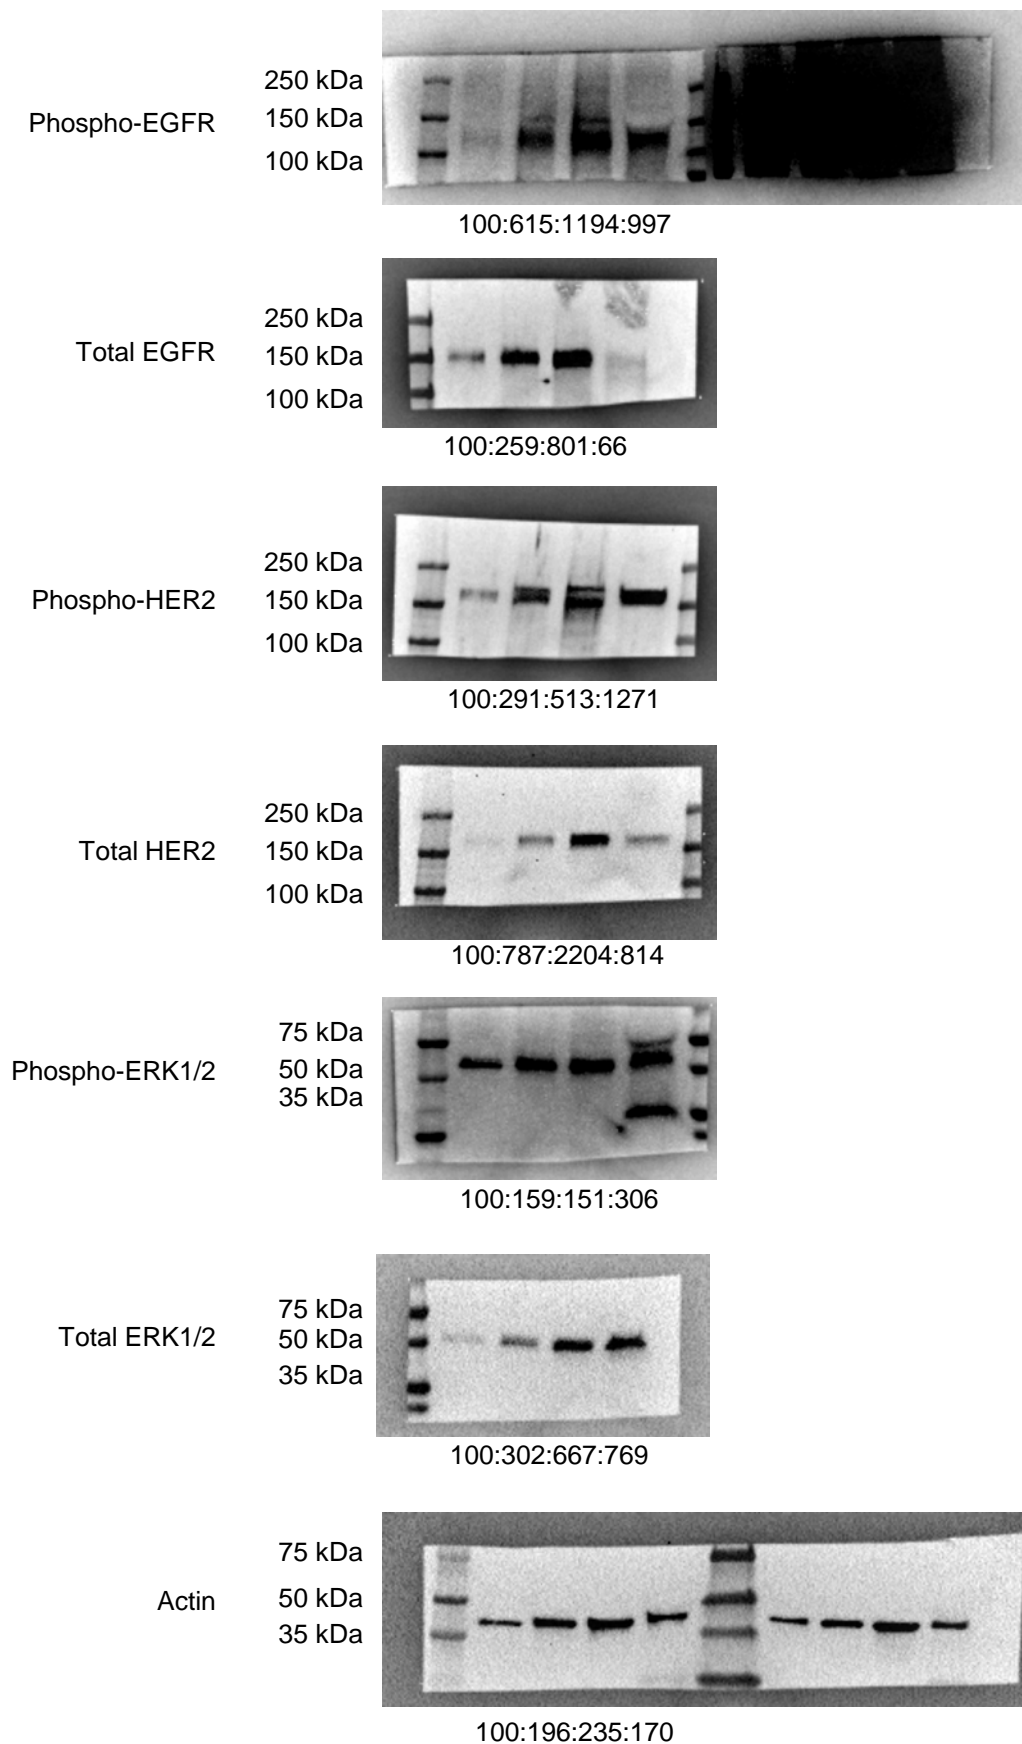

Figure S3

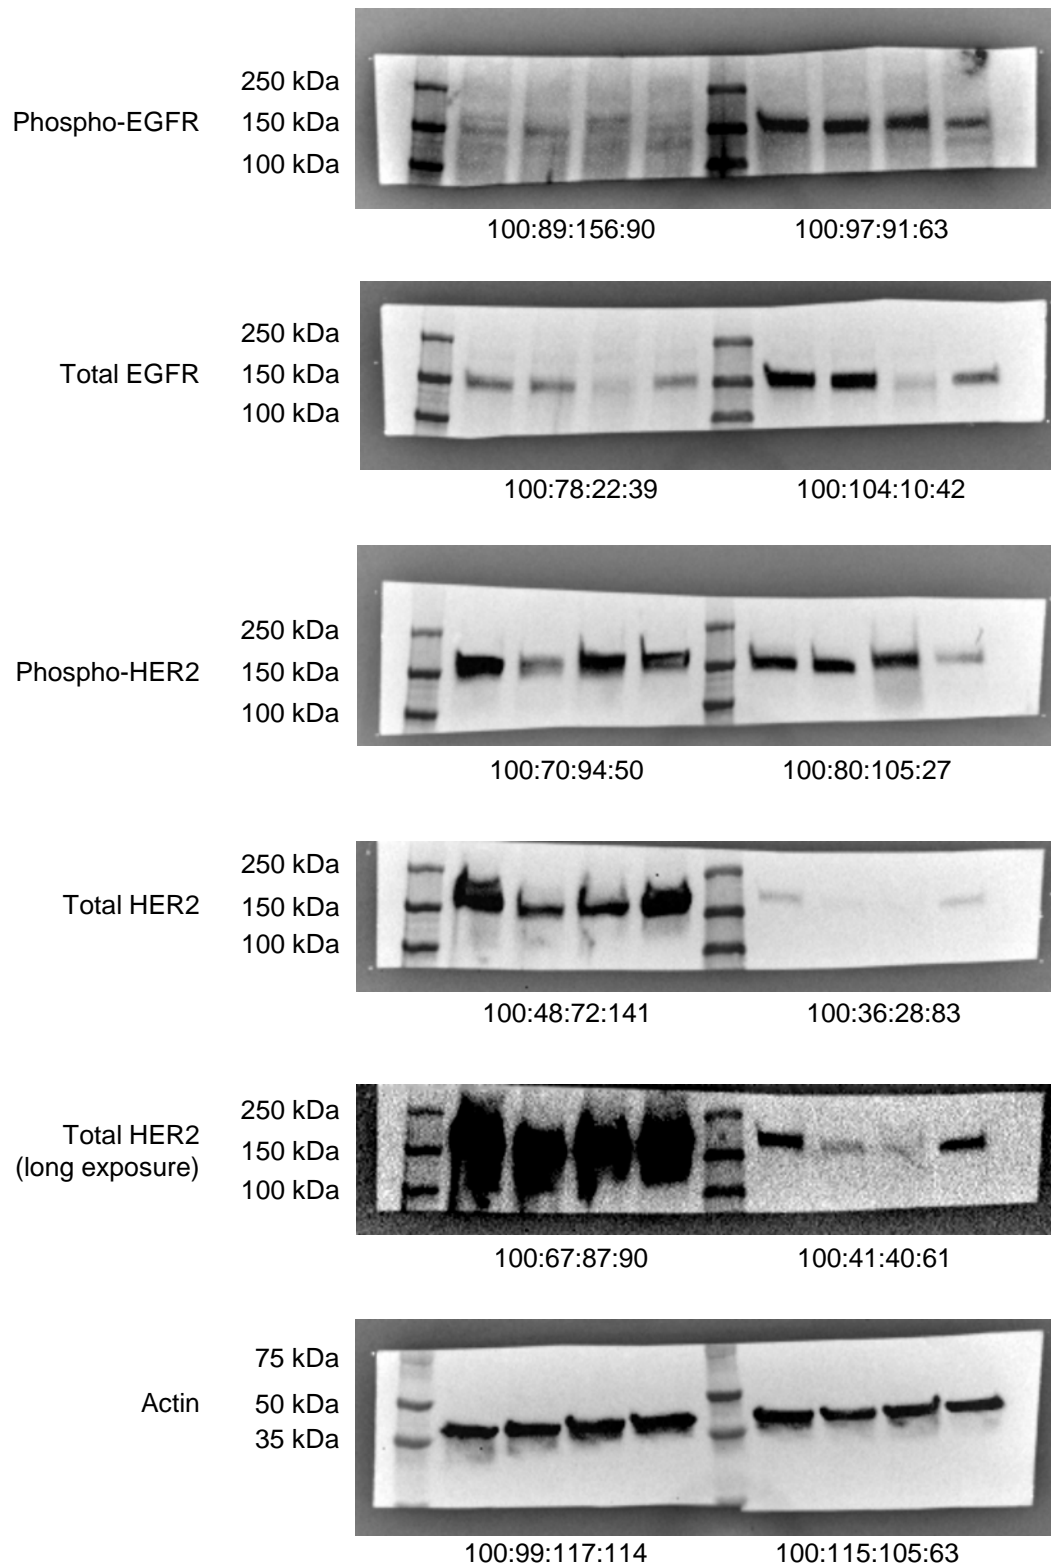

Figure S4

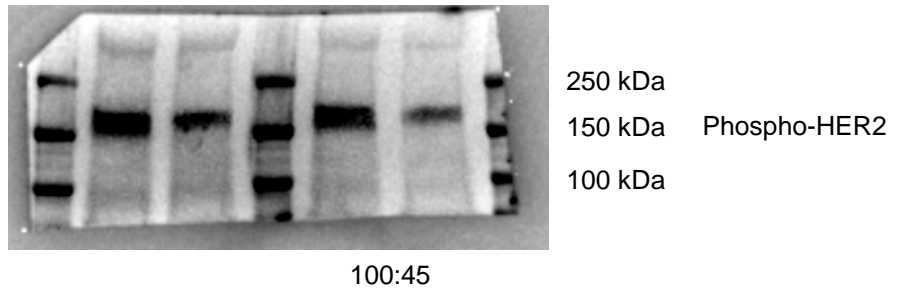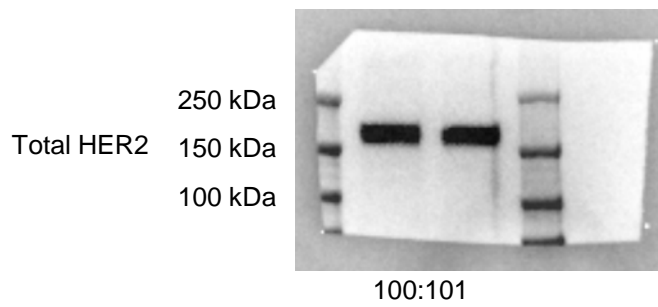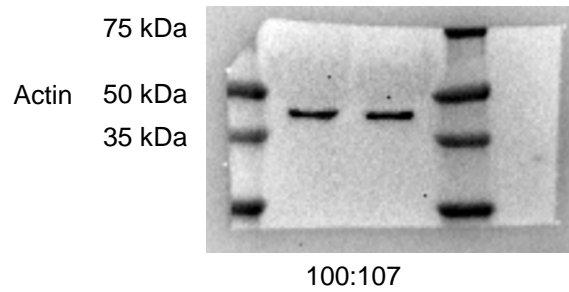

Figure S5

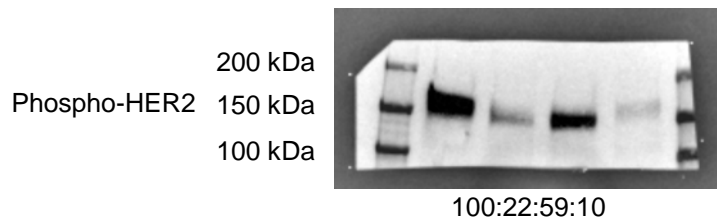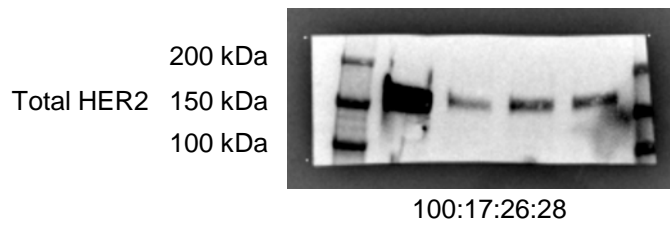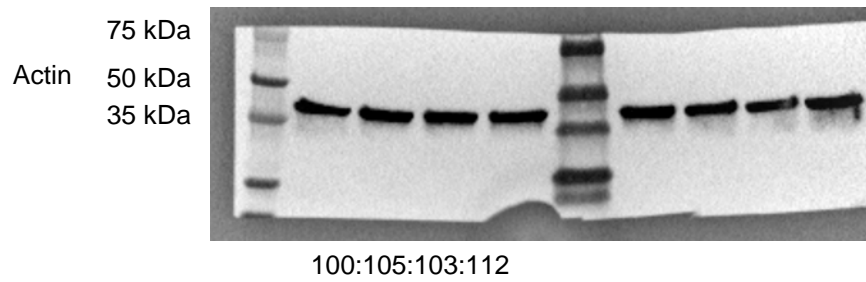

Figure S6

250 kDa  
Phospho-EGFR 150 kDa  
100 kDa

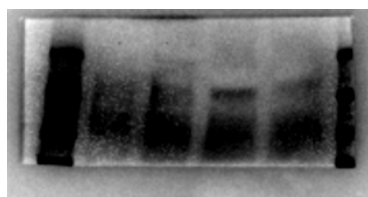

100:111:155

75 kDa  
Actin 50 kDa  
35 kDa

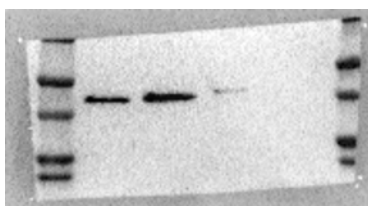

100:152:16

250 kDa  
Total EGFR 150 kDa  
100 kDa

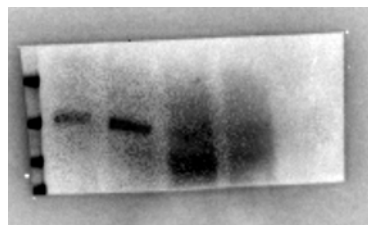

100:181:141

75 kDa  
Actin 50 kDa  
35 kDa

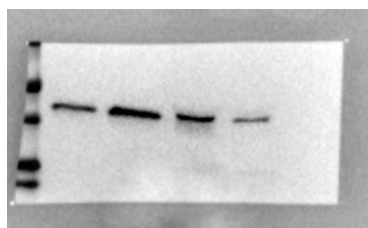

100:187:141

Figure S7

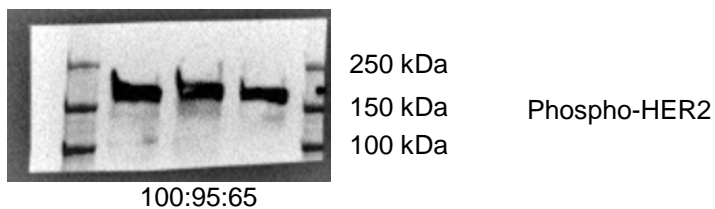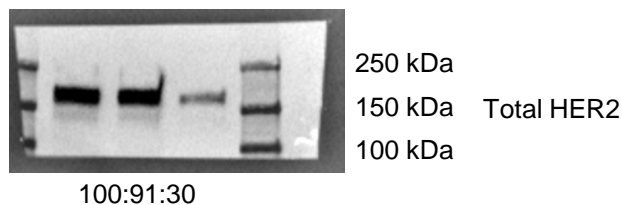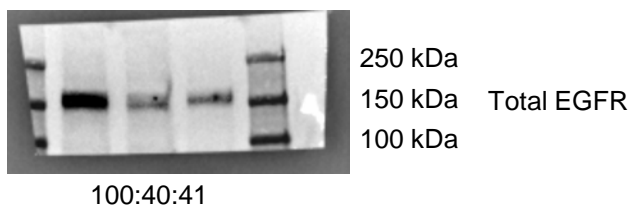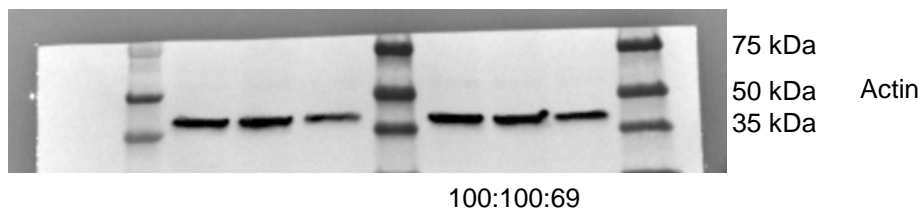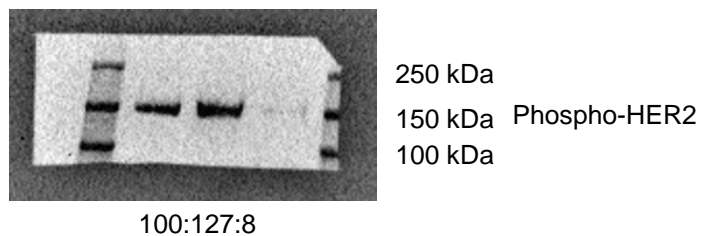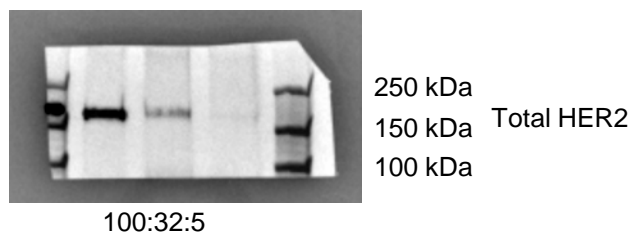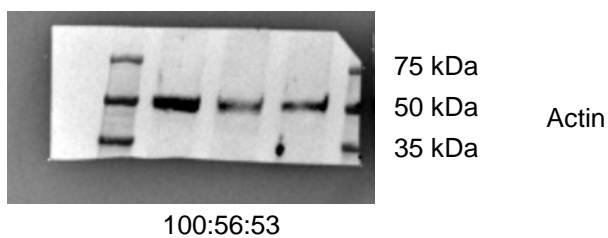

Figure S8



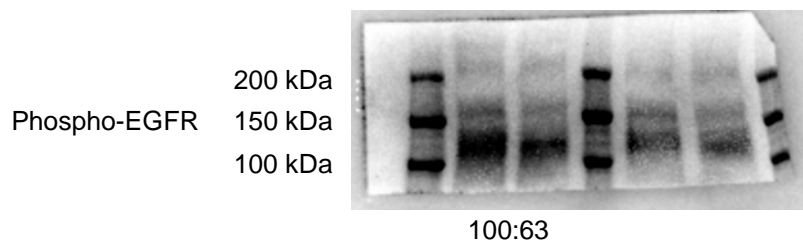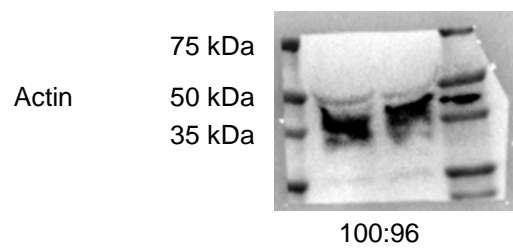

Figure S9

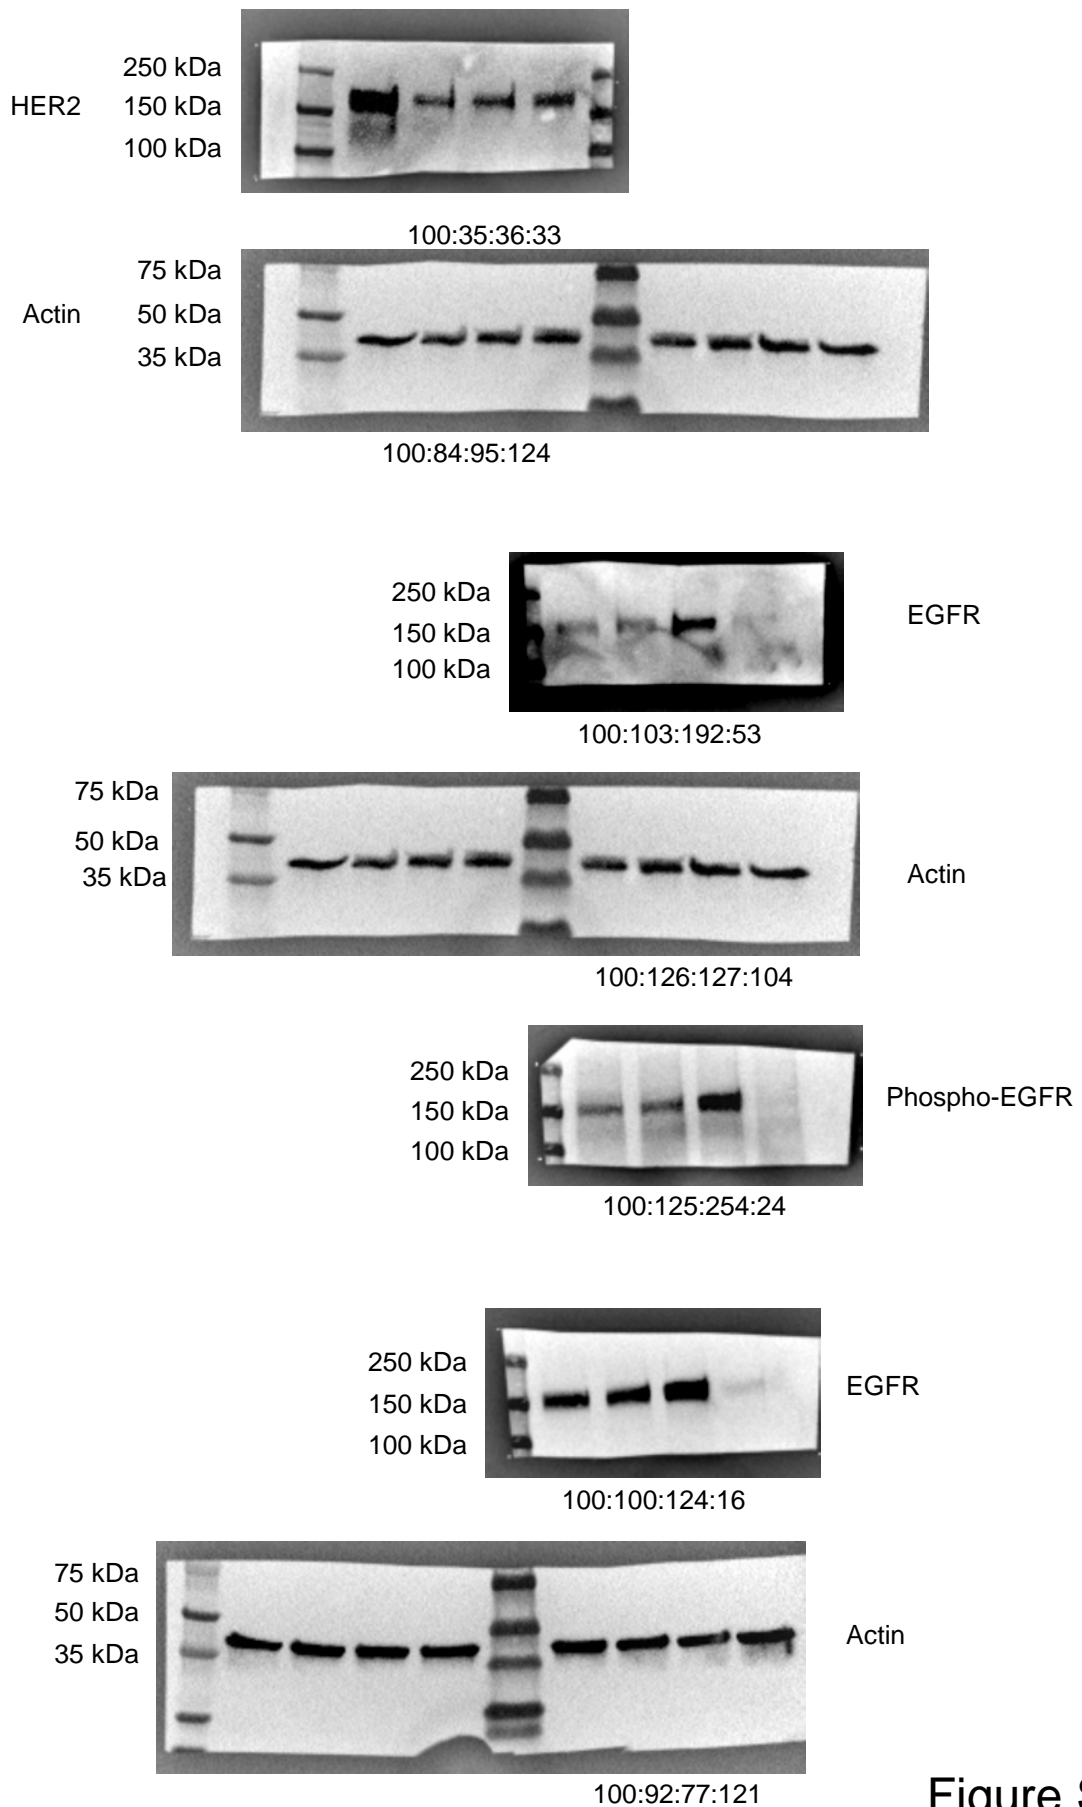

Figure S10
